# Supplementary material
Source: PubMed Central journal article supplement (PMC3117674)
Supplement: NIHMS294720-supplement-SupplFiguresTables.pdf [file NIHMS294720-supplement-SupplFiguresTables.pdf]

# Cerebrospinal Fluid Biomarkers for Parkinson Disease Diagnosis and Progression

## II. Supplementary Figures and Tables

A

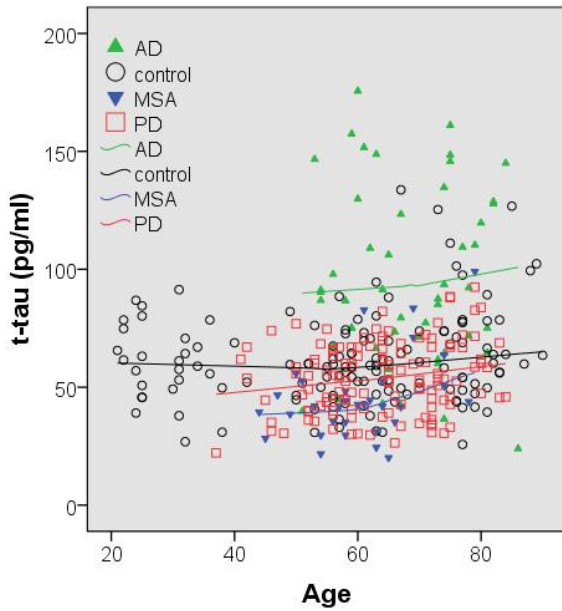

B

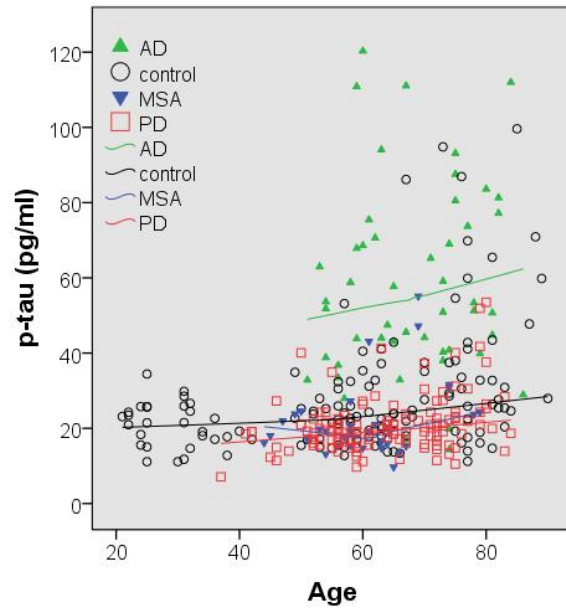

C

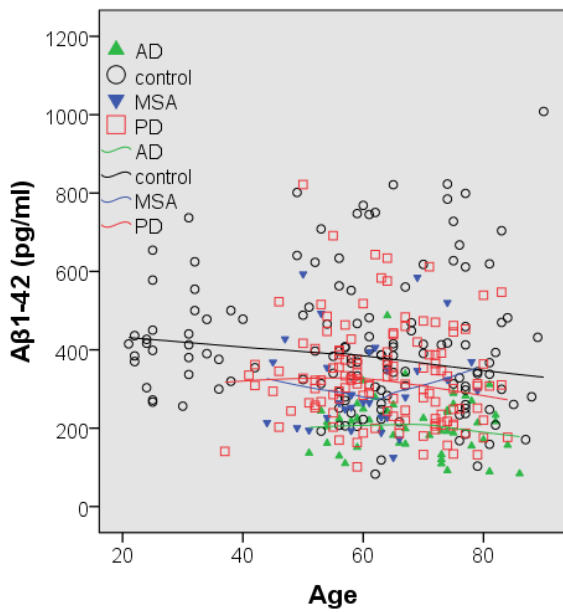

D

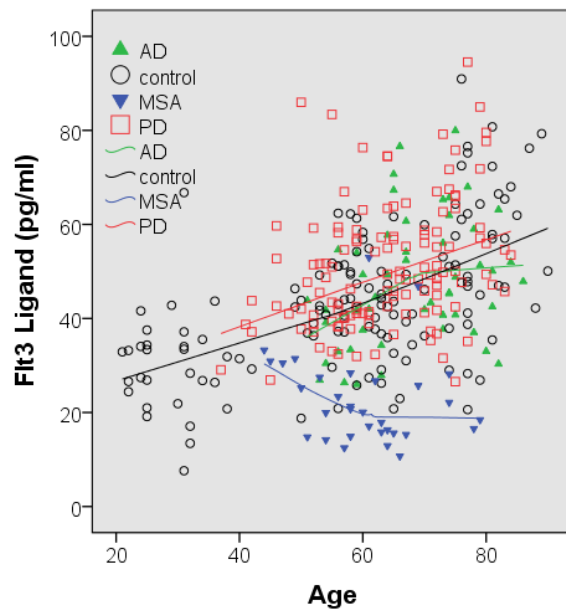

**E**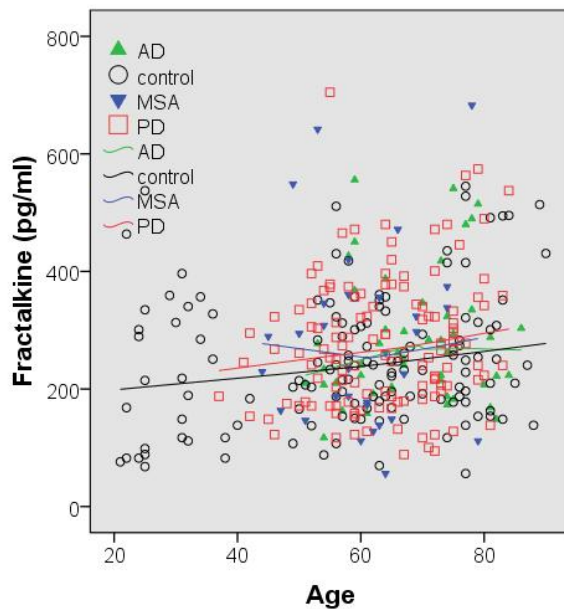

### Supplementary Figure 1. Age dependence of t-tau, p-tau, $A\beta_{1-42}$ , Flt3 ligand and fractalkine in CSF.

CSF total tau (t-tau) (**A**), phosphorylated tau (p-tau) (**B**), amyloid beta peptide 1-42 ( $A\beta_{1-42}$ ) (**C**), Flt3 ligand (**D**) and fractalkine (**E**) levels were measured in individual normal control and disease (AD, Alzheimer disease; PD, Parkinson disease; and MSA, multiple system atrophy) samples by Luminex. Levels of t-tau (**A**), along with p-tau (**B**) in CSF, tended to increase with age for all groups studied, with statistical significance achieved in MSA and PD patients for t-tau (MSA:  $r = 0.44$ ,  $P < 0.05$ ; PD:  $r = 0.21$ ,  $P < 0.05$ ) and in controls and PD patients for p-tau (control:  $r = 0.37$ ,  $P < 0.0001$ ; PD:  $r = 0.33$ ,  $P < 0.001$ ). Levels of Flt3 ligand (**D**) and fractalkine (**E**) also increased with age in control, PD, and/or AD groups: Flt3 ligand (control:  $r = 0.57$ ,  $P < 0.0001$ ; PD:  $r = 0.34$ ,  $P < 0.0001$ ; AD:  $r = 0.31$ ,  $P < 0.05$ ), fractalkine (CTL:  $r = 0.19$ ,  $P < 0.05$ ). Concentrations of  $A\beta_{1-42}$  (**C**) were stable with respect to age.

**A**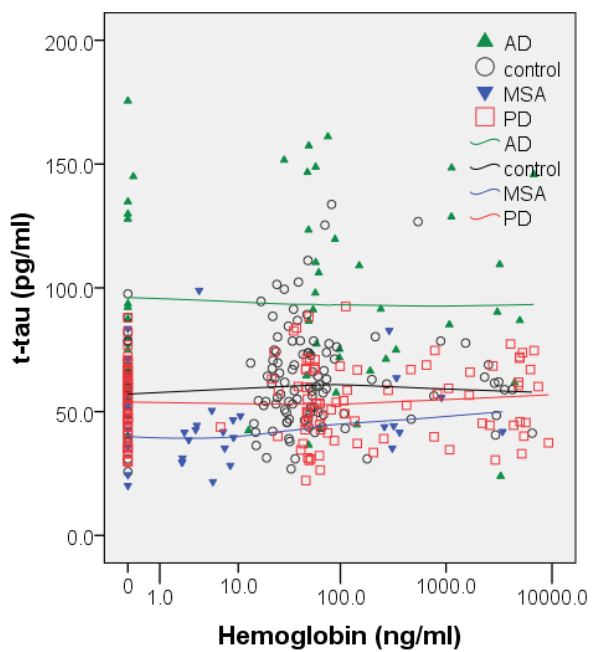**B**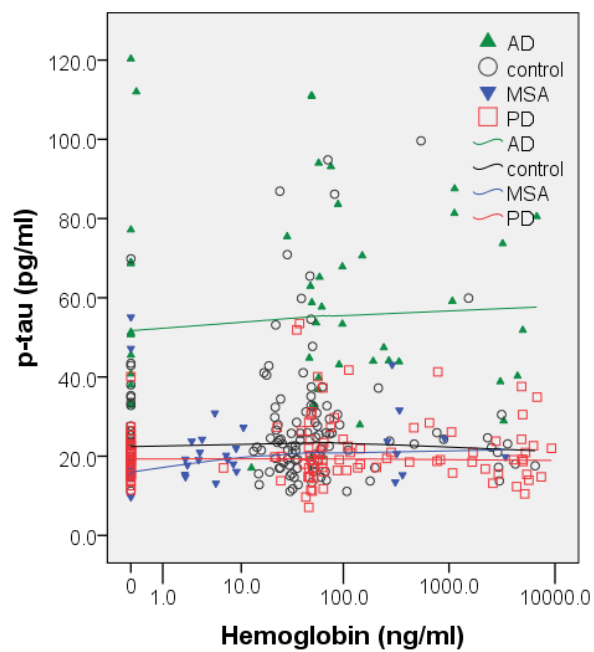**C**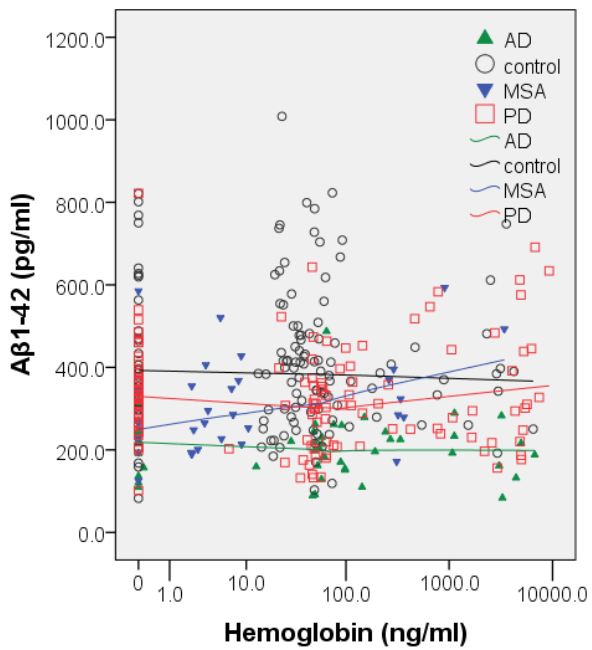**D**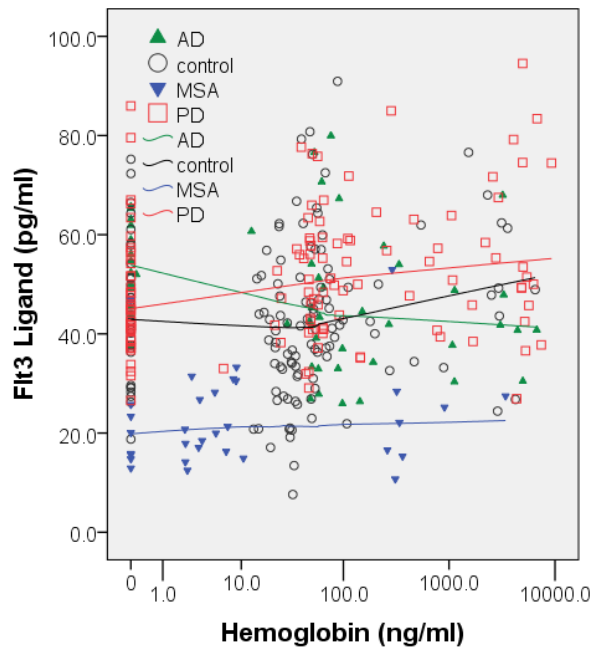

E

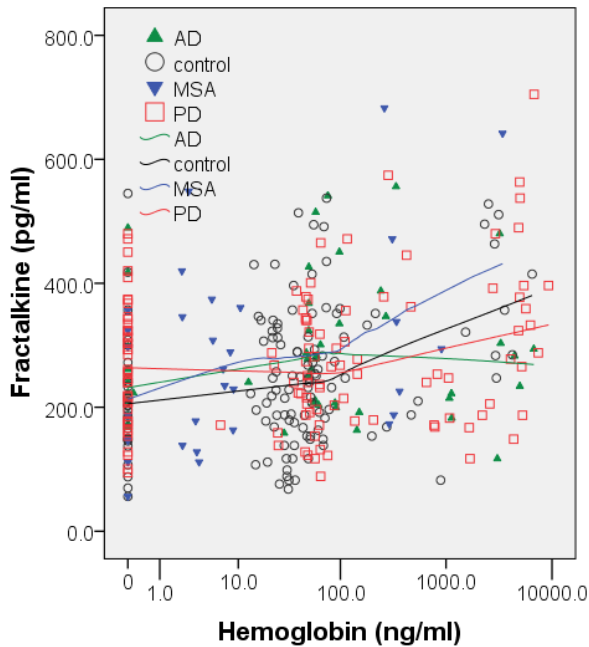

**Supplementary Figure 2. The effects of blood contamination on t-tau, p-tau,  $A\beta_{1-42}$ , Flt3 ligand and fractalkine levels in CSF.**

CSF total tau (t-tau) (A), phosphorylated tau (p-tau) (B), amyloid beta peptide 1-42 ( $A\beta_{1-42}$ ) (C), Flt3 ligand (D) and fractalkine (IL-8) (E) levels were measured in individual normal control and disease (AD, Alzheimer disease; PD, Parkinson disease; and MSA, multiple system atrophy) samples by Luminex, while the hemoglobin levels (as a index of red blood cell contamination in CSF) were measured using an ELISA kit. No association was observed between levels of CSF HGB and t-tau (A), p-tau (B) or Flt3 ligand (D); however,  $A\beta_{1-42}$  (C) and fractalkine (E) levels started to increase appreciably at high HGB concentrations:  $A\beta_{1-42}$  (MSA:  $r = 0.38$ ,  $P < 0.05$ ; PD:  $r = 0.19$ ,  $P < 0.05$ ), fractalkine (control:  $r = 0.33$ ,  $P < 0.001$ ; PD:  $r = 0.33$ ,  $P < 0.001$ ; MSA:  $r = 0.47$ ,  $P < 0.01$ ).

## Supplementary Table 1. Summary of demographics and characterizations of included MSA patients

| Sample ID | Age | Sex | Race    | Diagnosis | Dx. Detail * | Definite? **                                                         | On Sinemet? | Septal FDA              | Interpretation              |
|-----------|-----|-----|---------|-----------|--------------|----------------------------------------------------------------------|-------------|-------------------------|-----------------------------|
|           |     | M=1 | White=1 | Final     | Referral     |                                                                      | 1=On        | nCi-kg/cc-mCi           |                             |
| MSA92     | 79  | 1   | 1       | MSA       | MSA+OH       | Yes                                                                  | 0           | 9928                    | Normal                      |
| MSA94     | 62  | 1   | 1       | MSA       | MSA          | Yes                                                                  | 1           | 9121                    | Normal                      |
| MSA95     | 54  | 1   | 1       | MSA       | MSA+OH       | Yes                                                                  | 0           | 12037                   | Normal                      |
| MSA145    | 69  | 0   | 1       | MSA       | MSA+OH       | Yes                                                                  | 1           | 9068                    | Normal                      |
| MSA142    | 60  | 1   | 1       | MSA       | MSA+OH       | Yes                                                                  | 0           | 10299                   | Normal                      |
| MSA96     | 47  | 1   | 1       | MSA       | MSA+OH       | Yes                                                                  | 0           | 12582                   | Normal                      |
| MSA97     | 56  | 1   | 1       | MSA       | MSA          | Yes                                                                  | 1           | 4680                    | Dec. septum, NI. free wall† |
| MSA98     | 64  | 0   | 1       | MSA       | MSA          | Yes                                                                  | 0           | 11467                   | Normal                      |
| MSA100    | 65  | 0   | 1       | MSA       | MSA+OH       | Yes                                                                  | 1           | 9684                    | Normal                      |
| MSA101    | 69  | 0   | 1       | MSA       | MSA+OH       | No: vs. PD                                                           | 0           | 10929                   | Normal                      |
| MSA102    | 74  | 0   | 1       | MSA       | MSA          | Yes                                                                  | 0           | 10508                   | Normal                      |
| MSA103    | 51  | 0   | 1       | MSA       | MSA+OH Cbl.  | Yes: Cerebellar ataxia                                               | 0           | 11342                   | Normal                      |
| MSA104    | 63  | 1   | 1       | MSA       | MSA+OH       | Yes: Ataxia, urin. retent., no parkinsonism                          | 0           | 10664                   | Normal                      |
| MSA105    | 58  | 1   | 1       | MSA       | MSA+OH       | Yes: Progressive to death                                            | 0           | 9817                    | Normal                      |
| MSA125    | 61  | 0   | 1       | MSA       | MSA+OH       | Yes                                                                  | 1           | 8055                    | Normal                      |
| MSA110    | 78  | 1   | 1       | MSA       | MSA+OH       | Yes: Sinemet-unresponsive                                            | 0           | 7837                    | Normal                      |
| MSA112    | 66  | 1   | 1       | MSA       | MSA+OH       | No: vs. PD (Sinemet-responsive)                                      | 1           | 11241                   | Normal                      |
| MSA113    | 67  | 1   | 1       | MSA       | MSA+OH       | No: vs. PD (Sinemet-responsive)                                      | 1           | 11677                   | Normal                      |
| MSA2      | 53  | 1   | 1       | MSA       | MSA+OH       | Yes: Dysarthria, Sinemet-unresponsive, F-DOPA                        | 0           | No PET (Synth. Problem) | Normal                      |
| MSA23     | 58  | 0   | B       | MSA       | MSA+OH       | Yes: Dysarthria, ataxia, Sinemet-unresponsive                        | 0           | 17356                   | Normal                      |
| MSA32     | 49  | 1   | O       | MSA       | MSA          | Yes: Insecticide                                                     | 0           | 8689                    | Normal                      |
| MSA33     | 44  | 1   | 1       | MSA       | MSA+OH       | No: vs. PD (Sinemet-responsive)                                      | 0           | 7690                    | Normal                      |
| MSA35     | 57  | 0   | B       | MSA       | MSA+OH Cbl.  | Yes: Dysarthria, Sinemet-unresponsive, F-DOPA                        | 0           | 11335                   | Normal                      |
| MSA21     | 64  | 1   | 1       | MSA       | MSA+OH Cbl.  | Yes: Ataxia, urin. retent., no parkinsonism                          | 0           | 9598                    | Normal                      |
| MSA18     | 58  | 0   | 1       | MSA       | MSA+OH       | No: vs. PD (Sinemet-responsive)                                      | 0           | 10740                   | Normal                      |
| MSA34     | 58  | 1   | 1       | MSA       | MSA+OH Cbl.  | Yes: Dysarthria, no tremor, no Sinemet R, progressive, urin. retent. | 0           | 10832                   | Normal                      |
| MSA10     | 45  | 1   | 1       | MSA       | MSA+OH       | No: vs. PD (Sinemet-responsive)                                      | 0           | 10242                   | Normal                      |
| MSA25     | 63  | 1   | 1       | MSA       | MSA          | Yes: Dysarthria, no Sinemet R, progressive, urin. retent.            | 0           | 11722                   | Normal                      |
| MSA13     | 54  | 1   | O       | MSA       | MSA+OH       | No: No resting tremor, no Sinemet trial                              | 0           | 9855                    | Normal                      |
| MSA45     | 61  | 0   | ME      | MSA       | MSA-P        | No: ± Sinemet R                                                      | 0           | 10226                   | Normal                      |
| MSA44     | 74  | 1   | 1       | MSA       | MSA-P        | No: vs. PD (Sinemet-resp., no slur)                                  | 0           | 8875                    | Normal                      |
| MSA41     | 50  | 1   | 1       | MSA       | MSA+OH Cbl.  | Yes: Dysarthria, no parkinsonism, cerebellar atrophy, progressive    | 0           | 7813                    | Normal                      |

\* OH: orthostatic hypotension; OH Cbl.: OH and signs of cerebellar failure.

\*\* “no Sinemet R”: no Sinemet response; “urin. Retent.”: symptoms of urinary retention.

† This patient had decreased 6-<sup>18</sup>F-fluorodopamine-derived radioactivity in the interventricular septum and normal radioactivity in the left ventricular free wall. The decreased septal radioactivity may have reflected decreased local blood flow.

**Supplementary Table 2. Receiver operating characteristic (ROC) analysis of cerebrospinal fluid individual or combinations of biomarkers**

|                                               | ALL cases |         |              |          |          | Cases with age < 65 |         |              |          |          | Cases with age ≥ 65 |         |              |          |          |
|-----------------------------------------------|-----------|---------|--------------|----------|----------|---------------------|---------|--------------|----------|----------|---------------------|---------|--------------|----------|----------|
|                                               | AUC       | p-value | cutoff value | sens (%) | spec (%) | AUC                 | p-value | cutoff value | sens (%) | spec (%) | AUC                 | p-value | cutoff value | sens (%) | spec (%) |
| <b>PD vs Control</b>                          |           |         |              |          |          |                     |         |              |          |          |                     |         |              |          |          |
| DJ-1                                          | 0.77      | <.001   | 40           | 94       | 50       | 0.72                | <.001   | 40           | 98       | 34       | 0.86                | <.001   | 40           | 90       | 73       |
| α-syn                                         | 0.71      | <.001   | 0.5          | 92       | 38       | 0.65                | <.05    | 0.5          | 92       | 23       | 0.83                | <.001   | 0.5          | 93       | 41       |
| Flt3 ligand                                   | 0.57      | 0.104   |              |          |          | 0.62                | <.05    | 37.15        | 90       | 27       | 0.52                | 0.71    |              |          |          |
| fractalkine                                   | 0.56      | 0.163   |              |          |          | 0.61                | 0.056   |              |          |          | 0.52                | 0.716   |              |          |          |
| t-tau                                         | 0.61      | <.05    | 71.41        | 91       | 25       | 0.58                | 0.167   | 71.41        | 94       | 16       | 0.65                | <.05    | 71.41        | 83       | 47       |
| p-tau                                         | 0.65      | 0.001   | 30           | 90       | 33       | 0.63                | <.05    | 30           | 98       | 18       | 0.70                | 0.001   | 30           | 80       | 48       |
| Aβ <sub>1-42</sub>                            | 0.62      | <.05    | 464.44       | 92       | 29       | 0.59                | 0.151   | 464.44       | 92       | 71       | 0.68                | <.05    | 464.44       | 90       | 30       |
| p-tau/t-tau                                   | 0.62      | <.05    | 0.49         | 83       | 30       | 0.59                | 0.109   |              |          |          | 0.64                | <.05    | 0.49         | 73       | 41       |
| p-tau/Aβ <sub>1-42</sub>                      | 0.56      | 0.141   |              |          |          | 0.55                | 0.44    |              |          |          | 0.60                | 0.113   |              |          |          |
| t-tau/Aβ <sub>1-42</sub>                      | 0.52      | 0.625   |              |          |          | 0.53                | 0.67    |              |          |          | 0.64                | 0.574   |              |          |          |
| DJ-1 & Flt3 ligand <sup>A</sup>               | 0.84      | <.001   | 26.11        | 94       | 60       | 0.81                | <.001   | 26.11        | 94       | 52       | 0.88                | <.001   | 26.11        | 93       | 70       |
| p-tau, t-tau, Aβ <sub>1-42</sub> <sup>B</sup> | 0.69      | <.001   | 583.55       | 91       | 41       | 0.64                | <.05    | 583.55       | 90       | 29       | 0.77                | <.001   | 583.55       | 93       | 56       |
| <b>MSA vs Control</b>                         |           |         |              |          |          |                     |         |              |          |          |                     |         |              |          |          |
| DJ-1                                          | 0.85      | <.001   | 37.6         | 94       | 55       |                     |         |              |          |          |                     |         |              |          |          |
| α-syn                                         | 0.88      | <.001   | 0.46         | 94       | 70       |                     |         |              |          |          |                     |         |              |          |          |
| Flt3 ligand                                   | 0.95      | <.001   | 28.26        | 95       | 90       |                     |         |              |          |          |                     |         |              |          |          |
| fractalkine                                   | 0.47      | 0.664   |              |          |          |                     |         |              |          |          |                     |         |              |          |          |
| t-tau                                         | 0.77      | <.001   | 71.17        | 90       | 26       |                     |         |              |          |          |                     |         |              |          |          |
| p-tau                                         | 0.68      | <.05    | 30.89        | 90       | 32       |                     |         |              |          |          |                     |         |              |          |          |
| Aβ <sub>1-42</sub>                            | 0.70      | <.05    | 407.01       | 90       | 39       |                     |         |              |          |          |                     |         |              |          |          |
| p-tau/t-tau                                   | 0.70      | <.05    | 0.34         | 88       | 31       |                     |         |              |          |          |                     |         |              |          |          |
| p-tau/Aβ <sub>1-42</sub>                      | 0.70      | <.05    | 0.06         | 88       | 53       |                     |         |              |          |          |                     |         |              |          |          |
| t-tau/Aβ <sub>1-42</sub>                      | 0.49      | 0.867   |              |          |          |                     |         |              |          |          |                     |         |              |          |          |
| DJ-1, p-tau/t-tau <sup>C</sup>                | 0.93      | <.001   | 11           | 95       | 70       |                     |         |              |          |          |                     |         |              |          |          |
| <b>AD vs Control</b>                          |           |         |              |          |          |                     |         |              |          |          |                     |         |              |          |          |
| DJ-1                                          | 0.50      | 0.998   |              |          |          | 0.64                | 0.079   |              |          |          | 0.64                | 0.077   |              |          |          |
| α-syn                                         | 0.63      | <.05    | 0.35         | 90       | 20       | 0.80                | <.001   | 0.35         | 94       | 30       | 0.54                | 0.569   |              |          |          |
| Flt3 ligand                                   | 0.54      | 0.435   |              |          |          | 0.45                | 0.555   |              |          |          | 0.60                | 0.179   |              |          |          |
| fractalkine                                   | 0.57      | 0.211   |              |          |          | 0.53                | 0.622   |              |          |          | 0.58                | 0.313   |              |          |          |
| t-tau                                         | 0.77      | <.001   | 64.34        | 82       | 65       | 0.79                | <.001   | 64.34        | 89       | 18       | 0.72                | <.05    | 64.34        | 78       | 71       |
| p-tau                                         | 0.83      | <.001   | 19.81        | 90       | 63       | 0.94                | <.001   | 19.81        | 100      | 45       | 0.74                | 0.001   | 19.81        | 91       | 20       |
| Aβ <sub>1-42</sub>                            | 0.86      | <.001   | 312.28       | 92       | 65       | 0.84                | <.001   | 312.28       | 89       | 65       | 0.88                | <.001   | 312.28       | 96       | 67       |
| p-tau/t-tau                                   | 0.77      | <.001   | 0.4          | 92       | 41       | 0.89                | <.001   | 0.4          | 94       | 49       | 0.67                | <.05    | 0.4          | 91       |          |
| p-tau/Aβ <sub>1-42</sub>                      | 0.91      | <.001   | 0.098        | 95       | 78       | 0.94                | <.001   | 0.098        | 94       | 84       | 0.88                | <.001   | 0.098        | 96       | 72       |
| t-tau/Aβ <sub>1-42</sub>                      | 0.92      | <.001   | 0.23         | 85       | 78       | 0.91                | <.001   | 0.23         | 89       | 88       | 0.93                | <.001   | 0.23         | 96       | 72       |
| <b>PD vs MSA</b>                              |           |         |              |          |          |                     |         |              |          |          |                     |         |              |          |          |
| DJ-1                                          | 0.67      | <.05    | 17.06        | 92       | 20       |                     |         |              |          |          |                     |         |              |          |          |
| α-syn                                         | 0.72      | <.05    | 0.26         | 91       | 25       |                     |         |              |          |          |                     |         |              |          |          |
| Flt3 ligand                                   | 0.98      | <.001   | 29.9         | 99       | 95       |                     |         |              |          |          |                     |         |              |          |          |
| fractalkine                                   | 0.57      | 0.351   |              |          |          |                     |         |              |          |          |                     |         |              |          |          |
| t-tau                                         | 0.70      | <.05    | 35.81        | 90       | 40       |                     |         |              |          |          |                     |         |              |          |          |
| p-tau                                         | 0.57      | 0.321   | 14.72        | 90       | 10       |                     |         |              |          |          |                     |         |              |          |          |
| Aβ <sub>1-42</sub>                            | 0.61      | 0.135   | 187.13       | 90       | 5        |                     |         |              |          |          |                     |         |              |          |          |
| p-tau/t-tau                                   | 0.72      | <.01    | 0.54         | 90       | 40       |                     |         |              |          |          |                     |         |              |          |          |
| p-tau/Aβ <sub>1-42</sub>                      | 0.65      | <.05    | 0.08         | 80       | 20       |                     |         |              |          |          |                     |         |              |          |          |
| t-tau/Aβ <sub>1-42</sub>                      | 0.60      | 0.172   |              |          |          |                     |         |              |          |          |                     |         |              |          |          |
| α-syn, p-tau/t-tau <sup>D</sup>               | 0.85      | <.001   | 0.154        | 90       | 65       |                     |         |              |          |          |                     |         |              |          |          |
| <b>PD vs AD</b>                               |           |         |              |          |          |                     |         |              |          |          |                     |         |              |          |          |
| DJ-1                                          | 0.76      | <.001   | 39.39        | 94       | 55       | 0.84                | <.001   | 39.39        | 98       | 61       | 0.70                | <.05    | 39.39        | 88       | 54       |
| α-syn                                         | 0.82      | <.001   | 0.5          | 92       | 62       | 0.89                | <.001   | 0.5          | 92       | 78       | 0.75                | 0.001   | 0.5          | 80       | 55       |
| Flt3 ligand                                   | 0.52      | 0.723   |              |          |          | 0.65                | 0.057   |              |          |          | 0.41                | 0.222   |              |          |          |
| fractalkine                                   | 0.50      | 0.956   |              |          |          | 0.58                | 0.355   |              |          |          | 0.46                | 0.612   |              |          |          |
| t-tau                                         | 0.84      | <.001   | 72.89        | 92       | 68       | 0.83                | <.001   | 72.89        | 94       | 67       | 0.83                | <.001   | 72.89        | 88       | 68       |
| p-tau                                         | 0.91      | <.001   | 32.01        | 93       | 87       | 0.97                | <.001   | 32.01        | 98       | 89       | 0.86                | <.001   | 32.01        | 85       | 86       |
| Aβ <sub>1-42</sub>                            | 0.81      | <.001   | 184.23       | 91       | 40       | 0.83                | <.001   | 184.23       | 94       | 22       | 0.79                | <.001   | 184.23       | 88       | 50       |
| p-tau/t-tau                                   | 0.86      | <.001   | 0.6          | 93       | 50       | 0.94                | <.001   | 0.6          | 98       | 61       | 0.80                | <.001   | 0.6          | 88       | 46       |
| p-tau/Aβ <sub>1-42</sub>                      | 0.94      | <.001   | 0.1351       | 93       | 90       | 0.95                | <.001   | 0.1351       | 98       | 94       | 0.92                | <.001   | 0.1351       | 85       | 86       |
| t-tau/Aβ <sub>1-42</sub>                      | 0.94      | <.001   | 0.297        | 92       | 84       | 0.93                | <.001   | 0.297        | 96       | 89       | 0.92                | <.001   | 0.297        | 85       | 82       |
| α-syn & Aβ <sub>1-42</sub> <sup>E</sup>       | 0.95      | <.001   | 169.1        | 93       | 84       | 0.98                | <.001   | 169.1        | 98       | 94       | 0.91                | <.001   | 169.1        | 85       | 77       |
| α-syn & DJ-1 <sup>F</sup>                     | 0.82      | <.001   | 160.2        | 92       | 63       | 0.90                | <.001   | 160.2        | 92       | 72       | 0.75                | 0.001   | 160.2        | 90       | 59       |

|                                         | ALL cases |         |              |          |          | Cases with age < 65 |         |              |          |          | Cases with age ≥ 65 |         |              |          |          |
|-----------------------------------------|-----------|---------|--------------|----------|----------|---------------------|---------|--------------|----------|----------|---------------------|---------|--------------|----------|----------|
|                                         | AUC       | p-value | cutoff value | sens (%) | spec (%) | AUC                 | p-value | cutoff value | sens (%) | spec (%) | AUC                 | p-value | cutoff value | sens (%) | spec (%) |
| <b>MSA vs AD</b>                        |           |         |              |          |          |                     |         |              |          |          |                     |         |              |          |          |
| DJ1                                     | 0.83      | <.001   | 20.74        | 90       | 35       |                     |         |              |          |          |                     |         |              |          |          |
| α-syn                                   | 0.92      | <.001   | 0.32         | 95       | 70       |                     |         |              |          |          |                     |         |              |          |          |
| Flt3 ligand                             | 0.95      | <.001   | 28.25        | 95       | 90       |                     |         |              |          |          |                     |         |              |          |          |
| fractalkine                             | 0.47      | 0.664   |              |          |          |                     |         |              |          |          |                     |         |              |          |          |
| t-tau                                   | 0.89      | <.001   | 43.77        | 92       | 60       |                     |         |              |          |          |                     |         |              |          |          |
| p-tau                                   | 0.90      | <.001   | 19.81        | 92       | 65       |                     |         |              |          |          |                     |         |              |          |          |
| Aβ <sub>1-42</sub>                      | 0.75      | <.05    | 282.3        | 90       | 40       |                     |         |              |          |          |                     |         |              |          |          |
| p-tau/t-tau                             | 0.70      | <.05    | 0.44         | 87       | 30       |                     |         |              |          |          |                     |         |              |          |          |
| p-tau/Aβ <sub>1-42</sub>                | 0.96      | <.001   | 0.1          | 95       | 90       |                     |         |              |          |          |                     |         |              |          |          |
| t-tau/Aβ <sub>1-42</sub>                | 0.96      | <.001   | 0.2331       | 95       | 90       |                     |         |              |          |          |                     |         |              |          |          |
| α-syn & Aβ <sub>1-42</sub> <sup>G</sup> | 0.99      | <.001   | 229.05       | 95       | 95       |                     |         |              |          |          |                     |         |              |          |          |

AD, Alzheimer disease; MSA, multiple system atrophy; PD, Parkinson disease.

Aβ<sub>1-42</sub>, amyloid beta peptide 1-42; α-syn, α-synuclein; p-tau, phosphorylated tau; t-tau, total tau. AUC, area under curve; Sens, sensitivity; Spec, specificity.

All the differential diagnostic testing listed was done with subjects younger than 50 and/or samples with high blood contamination (hemoglobin ≥ 200 ng/mL) excluded. For the combinations of biomarkers, values provided were derived from models based on logistic regression analysis. The models were then subjected to ROC to determine AUC, cutoff, sensitivity and specificity. Model equations are as the following:

- A.  $2[\text{DJ-1}] - [\text{Flt3 ligand}]$
- B.  $17[\text{p-tau}] + [\text{A}\beta_{1-42}] - 5[\text{t-tau}]$
- C.  $[\text{DJ-1}] - 49[\text{p-tau/t-tau}]$
- D.  $[\text{p-tau/t-tau}] - [\alpha\text{-syn}]$
- E.  $895[\alpha\text{-syn}] - [\text{A}\beta_{1-42}]$
- F.  $243[\alpha\text{-syn}] + [\text{DJ-1}]$
- G.  $1279[\alpha\text{-syn}] - [\text{A}\beta_{1-42}]$
